# Supplementary material
Source: PubMed Central journal article supplement (PMC4609730)
Supplement: JCM.01349-15_zjm999094549so1.pdf [file JCM.01349-15_zjm999094549so1.pdf]

**SUPPLEMENTRY FIGURE**

**Supplementary Figure 1.** SNP tree from assembled *E. coli* genomes generated by the snpTree server (1) and visualized with FigTree (<http://tree.bio.ed.ac.uk/software/figtree>) showing the diversity of *E. coli* lineages with identical IEE sequences (see Fig. 1). Maximum-likelihood phylogeny was constructed from a 70,282 SNP matrix. The tree was rooted at midpoint. Bootstrap values are shown at the nodes.

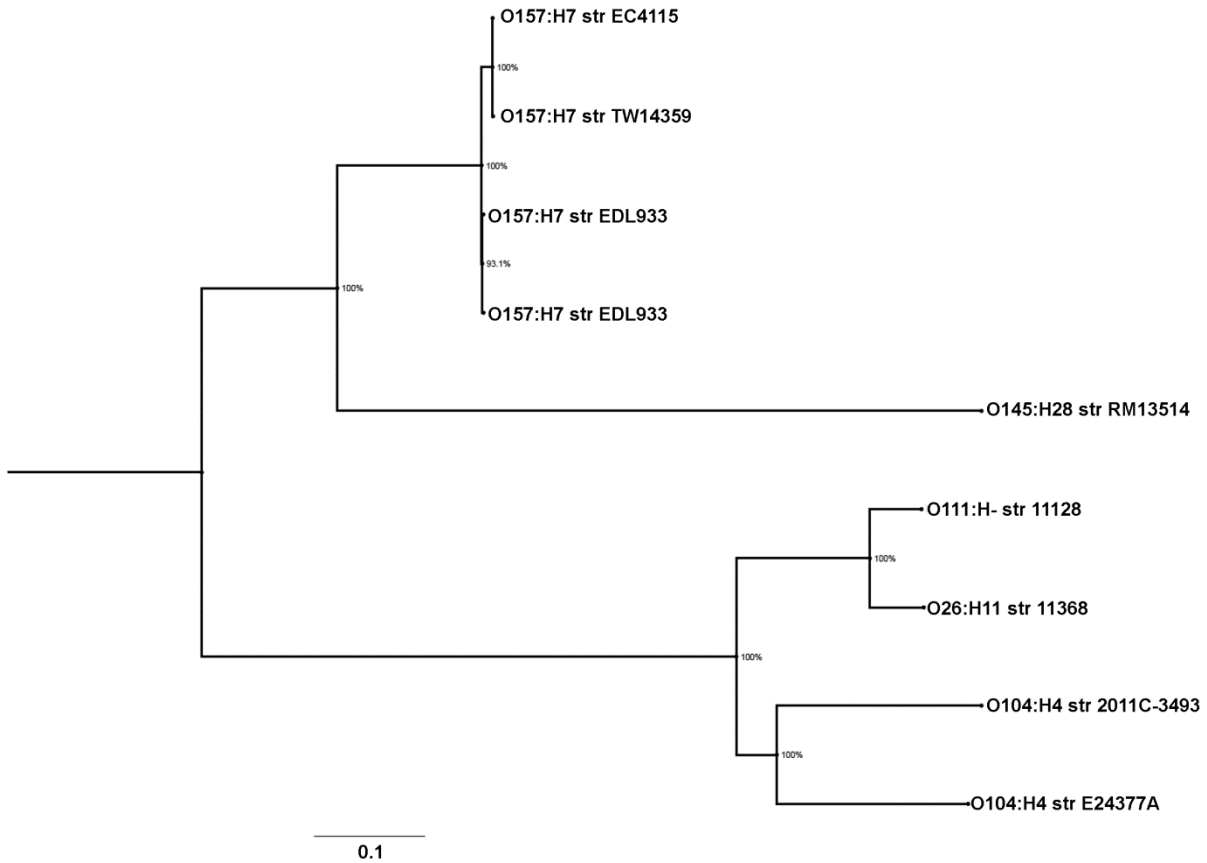

## References

1. Leekitcharoenphon, P., R. S. Kaas, M. C. Thomsen, C. Friis, S. Rasmussen, and F. M. Aarestrup. 2012. snpTree--a web-server to identify and construct SNP trees from whole genome sequence data. *BMC. Genomics* 13 Suppl 7:S6
